# Supplementary material for: Angptl8 mediates food-driven resetting of hepatic circadian clock in mice
Source: PubMed Central journal article supplement (PMC6684615; doi:10.1038/s41467-019-11513-1), 2019-08-06
Supplement: 41467_2019_11513_MOESM1_ESM.pdf [file 41467_2019_11513_MOESM1_ESM.pdf]

**Angptl8 mediates food-driven resetting of hepatic circadian clock in mice**

**Chen et al.**

**Supplementary Information**

**Supplementary Figures and Tables**

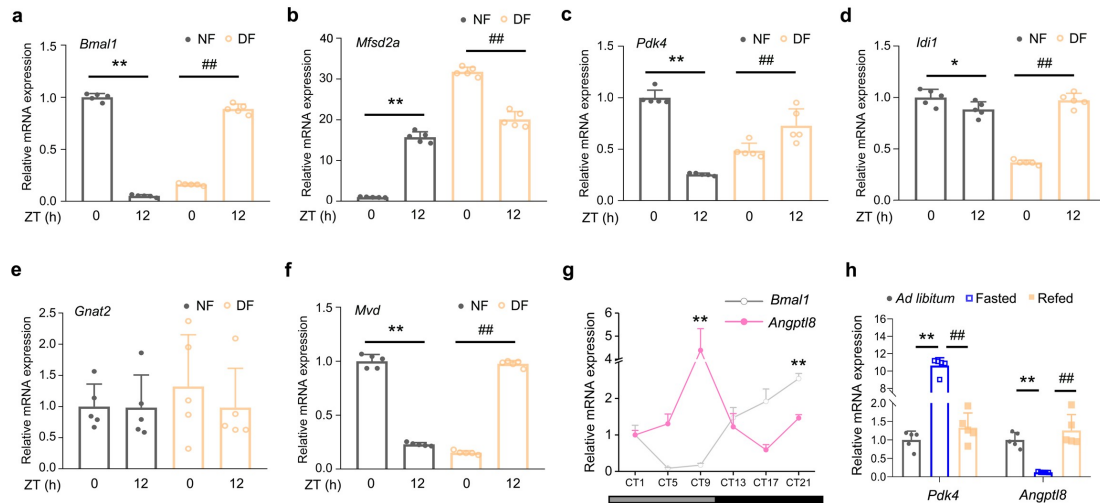

**Supplementary Fig. 1 | *Angptl8* responses to food signals and peripheral clocks.** a-f, qPCR analyses of the mRNA expression levels of *Bmal1* and 5 selected genes in the liver of mice subjected to time-restricted feeding. n=5, \* $P < 0.05$  and \*\* $P < 0.01$  NF12 vs. NF0 group, ### $P < 0.01$  DF12 vs. DF0 group, one-way ANOVA followed by Bonferroni's *posthoc* test. g, qPCR analyses of *Bmal1* and *Angptl8* mRNA expression in the liver of mice subjected to DD. n=5, \*\* $P < 0.01$ , Peak vs. Nadir, one-way ANOVA followed by Bonferroni's *posthoc* test. h, qPCR analyses of *Pdk4* and *Angptl8* mRNA expression in the liver of mice subjected to fasting/refeeding cycles. n=5, \*\* $P < 0.01$  16-h fasted vs. *Ad libitum* group, ### $P < 0.01$  16-h fasted vs. refeed group, one-way ANOVA followed by Bonferroni's *posthoc* test. All data are presented as the means  $\pm$  SD. Source data are provided as a Source Data file.

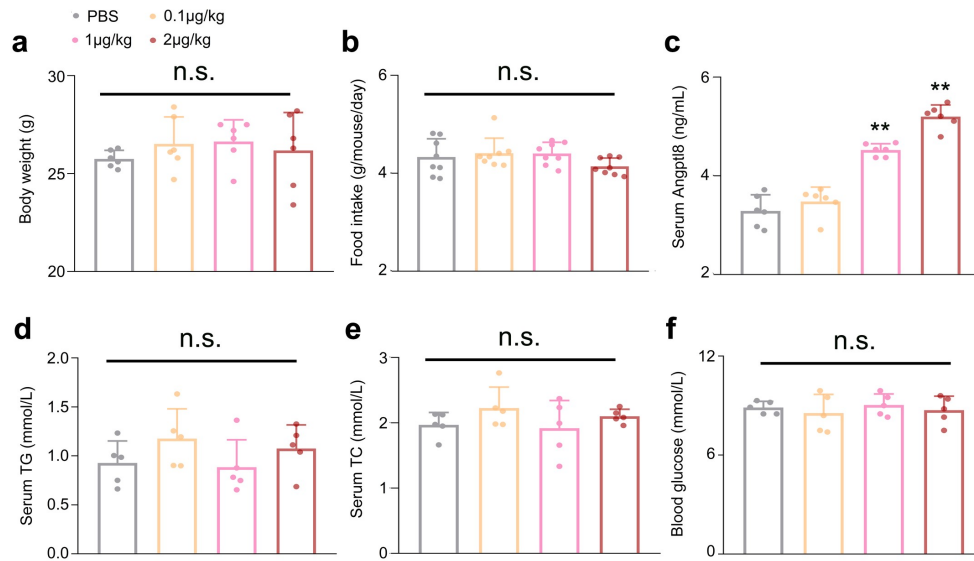

**Supplementary Fig. 2 | Dose titration of exogenous Angptl8 without significant altering metabolic homeostasis *in vivo*.** 8-week-old mice were *i.p.* injected with indicated doses of recombinant Angptl8 or vehicle (PBS) for 15 consecutive days at ZT2, and the serum samples were collected at ZT13 for the following analyses. **a**, Body weight. **b**, Food intake. **c**, Serum levels of Angptl8. n=6, \*\* $P < 0.01$  Angptl8 vs. PBS group, one-way ANOVA followed by Bonferroni's *posthoc* test. **d**, Serum levels of TG. **e**, Serum levels of TC. **f**, Blood glucose. n=5. All data are presented as the means  $\pm$  SD. Source data are provided as a Source Data file.

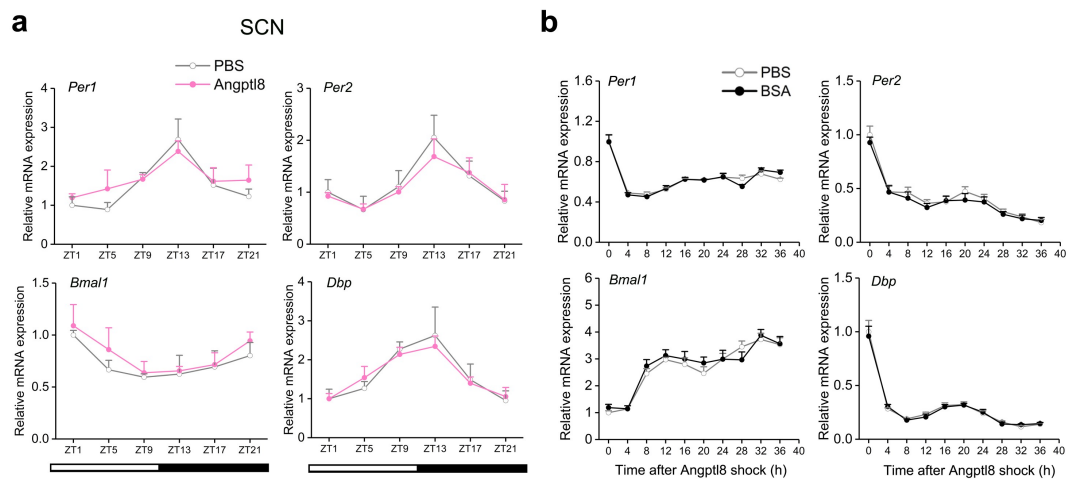

**Supplementary Fig. 3 | Angptl8 resets mouse liver clock. a**, qPCR analyses of clock genes in the SCN from mice in **Fig. 2d**. **b**, qPCR analyses of time-course expression of clock genes in mouse Hepa1c1c-7 hepatoma cells treated with either 40 nM BSA or vehicle (PBS) for 2 h. Note that in contrast to Angptl8 or 50% horse serum, neither BSA nor PBS induced rhythmic expression of clock genes.  $n=3$ . All data are presented as the means  $\pm$  SD. Source data are provided as a Source Data file.

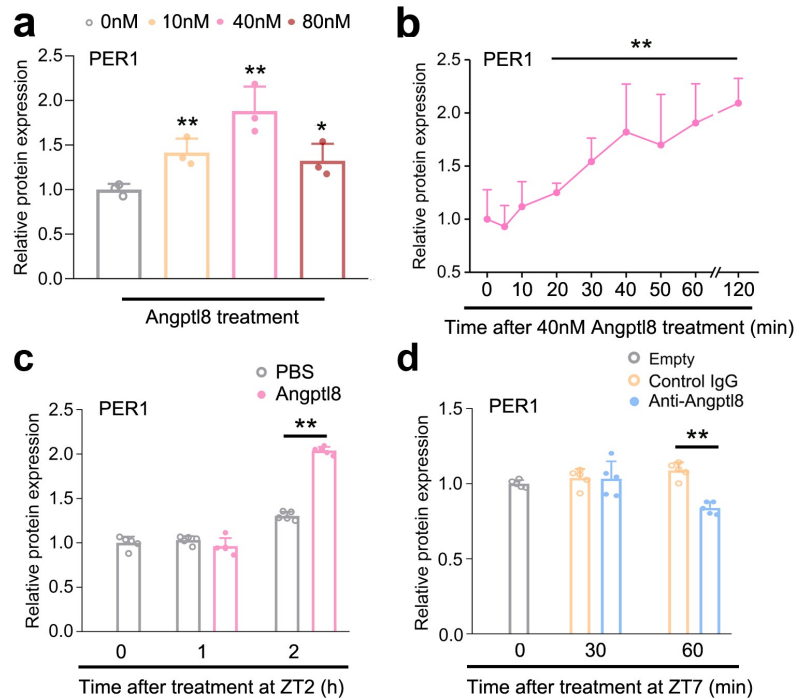

**Supplementary Fig. 4 | Angptl8 induces *Per1* expression *in vitro* and *in vivo*.** **a**, Quantitative analysis of *Per1* protein levels in Hepa1c1c-7 cells stimulated with Angptl8 at indicated doses for 2 h.  $n=3$ ,  $*P<0.05$  and  $**P<0.01$  Angptl8 vs. PBS, one-way ANOVA followed by Bonferroni's *posthoc* test. **b**, Quantitative analysis of *Per1* protein levels in Hepa1c1c-7 cells stimulated with 40 nM Angptl8 for indicated times.  $n=3$ ,  $**P<0.01$  vs. 0 h, one-way ANOVA followed by Bonferroni's *posthoc* test. **c**, Quantitative analysis of *Per1* protein levels in the liver of mice treated as described in Fig. 4g.  $n=5$ ,  $**P<0.01$  Angptl8 vs. PBS at the same time point, one-way ANOVA followed by Bonferroni's *posthoc* test. **d**, Quantitative analysis of *Per1* protein levels in the liver of mice treated as described in Fig. 4h.  $n=5$ ,  $**P<0.01$  Anti-Angptl8 vs. control IgG at the same time point, one-way ANOVA followed by Bonferroni's *posthoc* test. All data are presented as the means  $\pm$  SD. Source data are provided as a Source Data file.

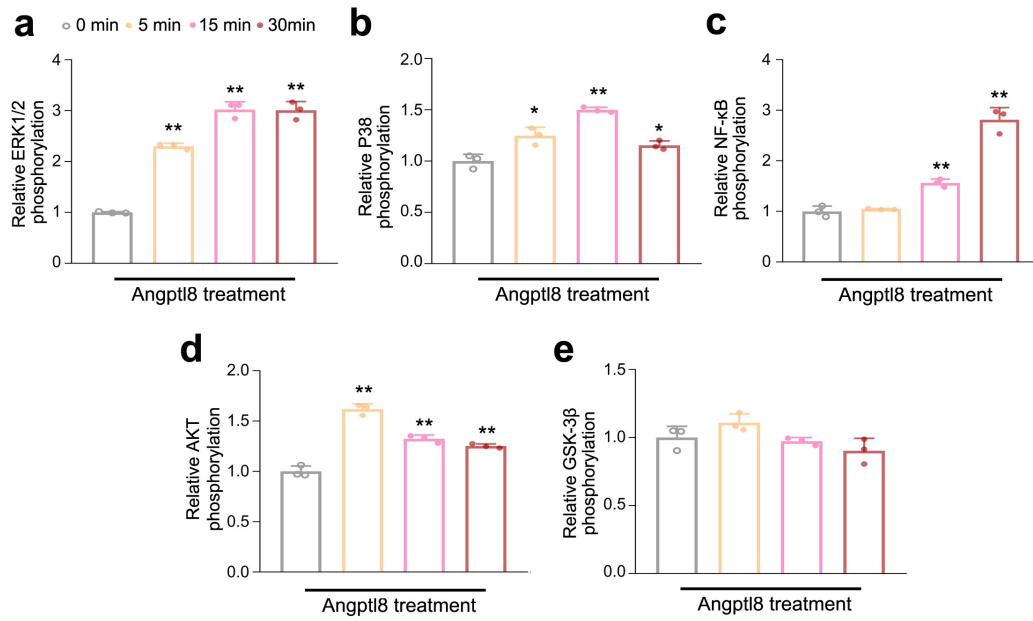

**Supplementary Fig. 5 | Kinases activation mediates Angptl8-induced Per1 expression.** a-e, Quantitative analysis of ERK1/2, P38, NF-κB, AKT and GSK-3β protein phosphorylation levels in Hepal1c-7 cells stimulated with 40 nM Angptl8 for indicated times. n=3. \* $P < 0.05$  and \*\* $P < 0.01$  Angptl8 vs. PBS, one-way ANOVA followed by Bonferroni's *posthoc* test. All data are presented as the means  $\pm$  SD. Source data are provided as a Source Data file.

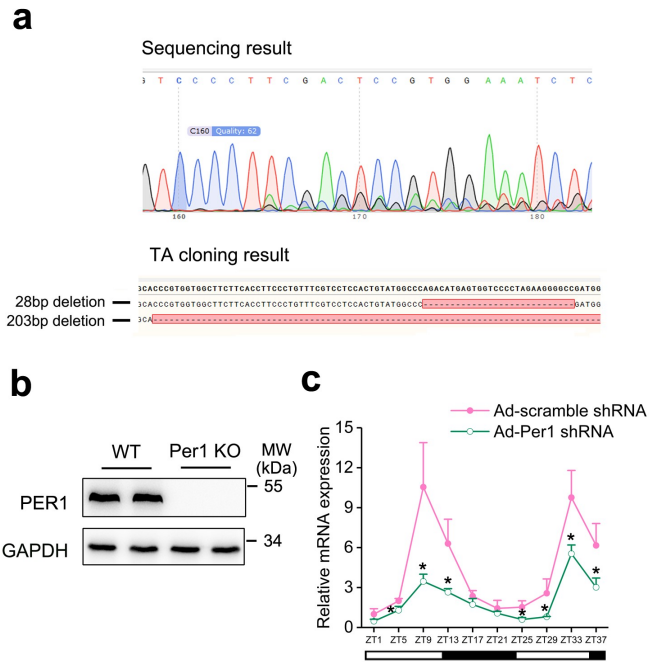

**Supplementary Fig. 6 | Per1 deficiency impairs the resetting functions of Angptl8.** **a**, Validation of knockout efficiency of *Per1* in *Per1* KO Hepa1c1c-7 cells. **b**, Western blot analyses of Per1 expression in either WT or *Per1* KO Hepa1c1c-7 cells. **c**, qPCR analyses of time-course mRNA expression of *Per1* genes in the liver of mice transduced with adenoviruses carrying either Per1 shRNA or scramble shRNA. n=3, \* $P < 0.05$  Ad-Per1 shRNA vs. Ad-scramble shRNA at the same time point, one-way ANOVA followed by Bonferroni's *posthoc* test. All data are presented as the means  $\pm$  SD. Source data are provided as a Source Data file.

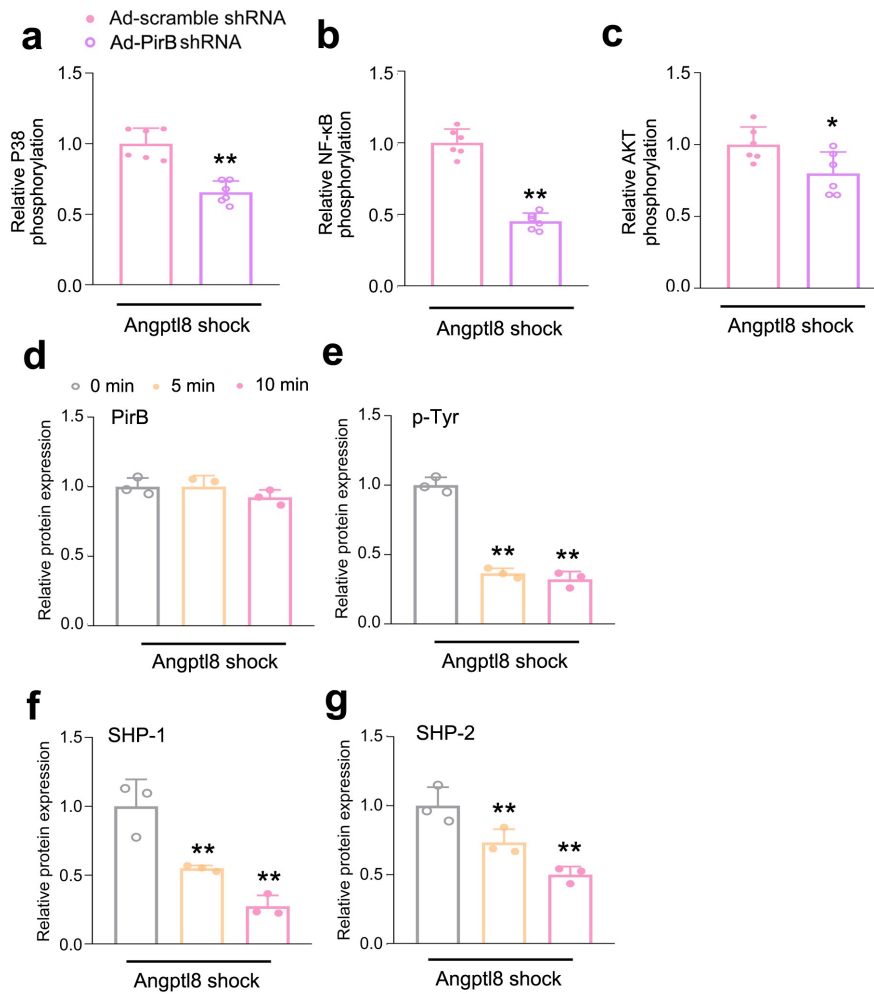

**Supplementary Fig. 7 | Quantitative analysis of protein expression in Fig. 8.** a-c, Quantitative analysis of Fig. 8e. \* $P < 0.05$  and \*\* $P < 0.01$  Ad-PirB shRNA vs. Ad-scramble shRNA, one-way ANOVA followed by Bonferroni's *posthoc* test. d-g, Quantitative analysis of Fig. 8f. \*\* $P < 0.01$  vs. 0 h, one-way ANOVA followed by Bonferroni's *posthoc* test. All data are presented as the means  $\pm$  SD. Source data are provided as a Source Data file.



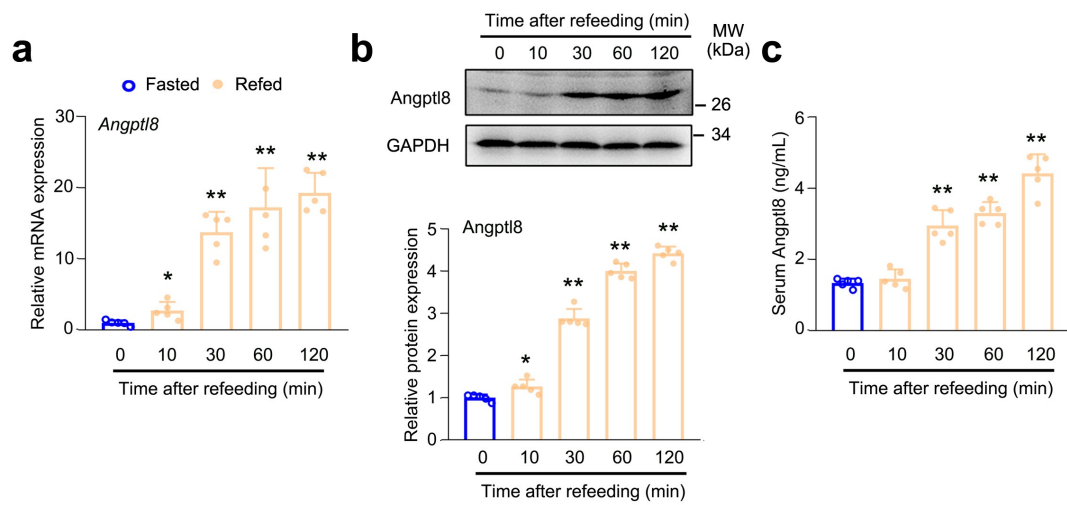

**Supplementary Fig. 8 | Angptl8 is induced by food signals.** Mice subjected to 12 h food deprivation (ZT13-1) followed by refeeding for indicated times. **a and b**, qPCR and Western blot analyses of hepatic Angptl8 expression levels. **c**, Serum Angptl8 levels.  $n=5$ ,  $*P<0.05$  and  $**P<0.01$  refeeding vs. fasting, one-way ANOVA followed by Bonferroni's *posthoc* test. All data are presented as the means  $\pm$  SD. Source data are provided as a Source Data file.

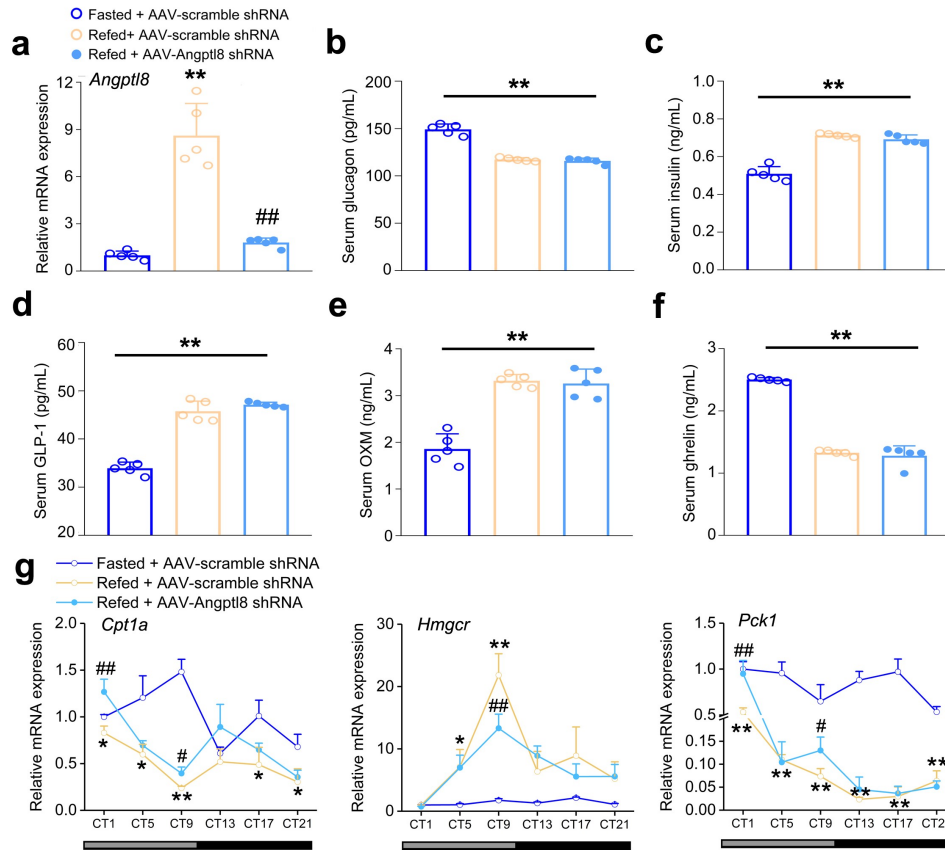

**Supplementary Fig. 9 | *Angptl8* knockdown dampens the liver clock reset by food.** **a**, qPCR analyses of *Angptl8* expression levels in the liver of mice subjected to 12 h food deprivation (ZT13-1) followed by refeeding for 20 min.  $n=5$ ,  $**P<0.01$  Refed vs. Fasted,  $##P<0.01$  AAV-Angptl8 shRNA vs. AAV-scramble shRNA, one-way ANOVA followed by Bonferroni's *posthoc* test. **b-f**, Serum levels of glucagon, insulin, GLP-1, OXM and ghrelin in mice of **a**.  $n=5$ ,  $**P<0.01$  Refed vs. Fasted mice, one-way ANOVA followed by Bonferroni's *posthoc* test. **g**, qPCR analyses of mRNA expression of metabolic genes in the liver of mice in **Fig. 9d**.  $n=3$ ,  $*P<0.05$  and  $**P<0.01$  Refed vs. Fasted mice.  $\#P<0.05$  and  $##P<0.01$  AAV-Angptl8 shRNA vs. AAV-scramble shRNA, two-way ANOVA followed by Bonferroni's *posthoc* test. All data are presented as the means  $\pm$  SD. Source data are provided as a Source Data file.

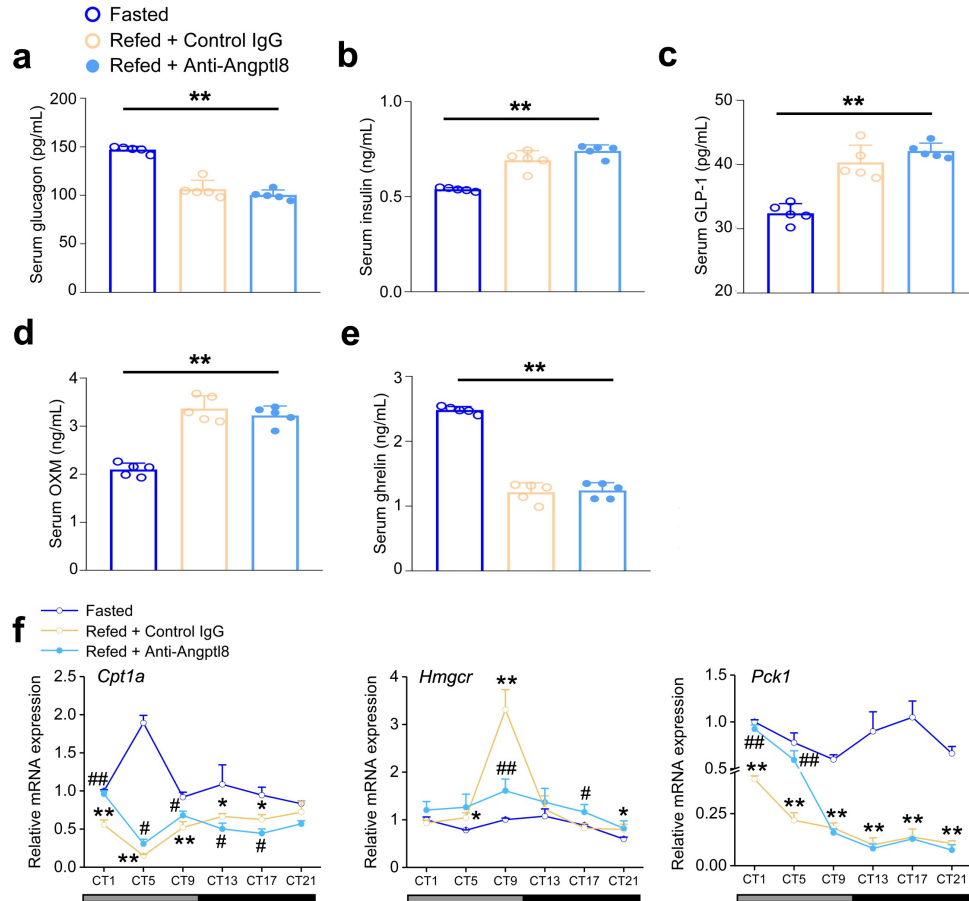

**Supplementary Fig. 10 | Angptl8 neutralization dampens the liver clock reset by food.** **a-e**, Serum levels of glucagon, insulin, GLP-1, OXM and ghrelin in mice subjected to 12-h food deprivation (ZT13-1) or 12 h food deprivation followed by 20 min refeeding. 1 h before refeeding, an acute injection of Angptl8 neutralized antibody (50  $\mu$ g/25 g) or control IgG was given to mice.  $n=5$ ,  $**P<0.01$  Refed vs. Fasted mice, one-way ANOVA followed by Bonferroni's *posthoc* test. **f**, qPCR analyses of mRNA expression of metabolic genes in the liver of mice in **Fig. 10c**.  $n=3$ ,  $*P<0.05$  and  $**P<0.01$  Refed vs. Fasted mice,  $\#P<0.05$  and  $\#\#P<0.01$  Anti-Angptl8 vs. control IgG at the same time point, two-way ANOVA followed by Bonferroni's *posthoc* test. All data are presented as the means  $\pm$  SD. Source data are provided as a Source Data file.

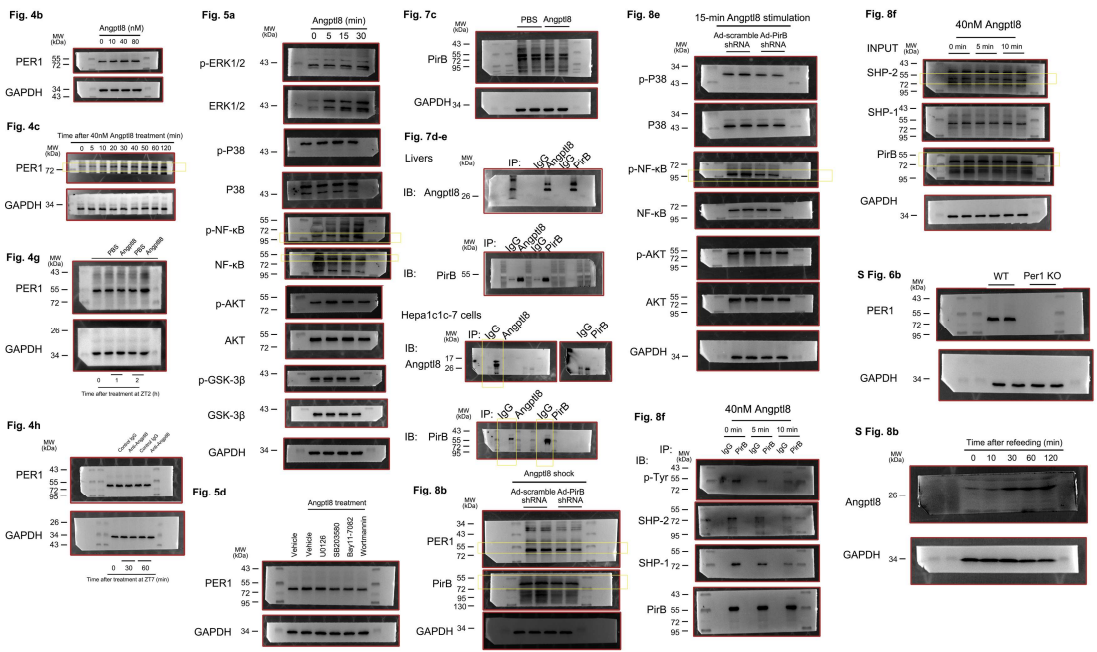

Supplementary Fig. 11 | Uncropped images of the blots included in the Figures.

**Supplementary Table 1. List of mRNAs clustered from Supplementary Data 1 and 2.**

| Tracking_ID  | Gene    | FPKM value        |        |       | Log2 (Fasted vs. <i>Ad libitum</i> )   $\geq 3$ | Log2 (Refed vs. <i>Ad libitum</i> )   $\leq 1$ |
|--------------|---------|-------------------|--------|-------|-------------------------------------------------|------------------------------------------------|
|              |         | <i>Ad libitum</i> | Fasted | Refed |                                                 |                                                |
| NM_029662    | Mfsd2a  | 275               | 5237   | 387   | 4.25                                            | 0.49                                           |
| NM_013743    | Pdk4    | 310               | 3111   | 265   | 3.33                                            | -0.23                                          |
| NM_013831    | Pstpip2 | 1055              | 126    | 894   | -3.07                                           | -0.24                                          |
| NM_024169    | Fkbp11  | 1635              | 181    | 1370  | -3.18                                           | -0.26                                          |
| NM_153526    | Insig1  | 25749             | 2518   | 32362 | -3.35                                           | 0.33                                           |
| NM_020010    | Cyp51   | 17246             | 1672   | 12209 | -3.37                                           | -0.50                                          |
| NM_146006    | Lss     | 4364              | 423    | 3166  | -3.37                                           | -0.46                                          |
| NM_025436    | Sc4mol  | 9124              | 822    | 7704  | -3.47                                           | -0.24                                          |
| NM_001080940 | Angptl8 | 2353              | 191    | 2604  | -3.62                                           | 0.15                                           |
| NM_010941    | Nsdhl   | 2927              | 223    | 2642  | -3.71                                           | -0.15                                          |
| NM_145360    | Idi1    | 13477             | 686    | 11016 | -4.30                                           | -0.29                                          |
| NM_008141    | Gnat2   | 350               | 17     | 293   | -4.36                                           | -0.26                                          |
| NM_138656    | Mvd     | 1489              | 65     | 1093  | -4.52                                           | -0.45                                          |
| NM_001253751 | Fdps    | 18492             | 767    | 16673 | -4.59                                           | -0.15                                          |

**Supplementary Table 2. List of mRNAs clustered from Supplementary Data 1 and 3.**

| Tracking_ID  | Gene    | FPKM value        |        |       |        |        |        |       |        | Log2 (Fasted vs. <i>Ad libitum</i> )   $\geq 3$ | Log2 (CT Peak vs. Nadir) $\geq 2$ |
|--------------|---------|-------------------|--------|-------|--------|--------|--------|-------|--------|-------------------------------------------------|-----------------------------------|
|              |         | <i>Ad libitum</i> | Fasted | CT1   | CT5    | CT9    | CT13   | CT17  | CT21   |                                                 |                                   |
| NM_010011    | Cyp4a10 | 793               | 200375 | 663   | 4961   | 7464   | 8137   | 392   | 3879   | 7.98                                            | 4.72                              |
| NM_012006    | Acot1   | 100               | 25014  | 134   | 1178   | 1115   | 1925   | 474   | 1339   | 7.97                                            | 2.37                              |
| NM_007822    | Cyp4a14 | 1858              | 438159 | 205   | 1906   | 6225   | 3481   | 220   | 889    | 7.88                                            | 2.02                              |
| NM_146230    | Acaa1b  | 1474              | 121472 | 10311 | 47785  | 36907  | 52392  | 18246 | 56306  | 6.36                                            | 2.06                              |
| NM_007437    | Aldh3a2 | 1612              | 46298  | 4034  | 17392  | 16074  | 20895  | 7293  | 18620  | 4.84                                            | 2.23                              |
| NM_030687    | Slco1a4 | 250               | 5784   | 318   | 1584   | 2531   | 2623   | 1505  | 1277   | 4.53                                            | 2.04                              |
| NM_007606    | Car3    | 309               | 6445   | 9200  | 172704 | 107209 | 146458 | 32238 | 230756 | 4.38                                            | 2.19                              |
| NM_007824    | Cyp7a1  | 153               | 3079   | 3885  | 15772  | 21752  | 14528  | 10909 | 8187   | 4.33                                            | 3.17                              |
| NM_001142804 | Acss3   | 116               | 2244   | 108   | 318    | 215    | 565    | 194   | 446    | 4.27                                            | 2.70                              |
| NM_029662    | Mfsd2a  | 275               | 5237   | 114   | 97     | 822    | 399    | 282   | 27     | 4.25                                            | 6.58                              |
| NM_027907    | Agxt2l1 | 301               | 5659   | 1027  | 6698   | 8946   | 7634   | 1846  | 8152   | 4.23                                            | 5.97                              |
| NM_029692    | Upp2    | 211               | 2866   | 2723  | 20099  | 28732  | 13958  | 6867  | 6067   | 3.76                                            | 2.11                              |
| NM_133894    | Ugt2b38 | 145               | 1711   | 1782  | 2945   | 842    | 1133   | 2714  | 3742   | 3.56                                            | 4.14                              |
| NM_013743    | Pdk4    | 310               | 3111   | 338   | 103    | 207    | 449    | 303   | 1288   | 3.33                                            | 2.61                              |
| NM_009349    | Inmt    | 1331              | 13261  | 4743  | 41809  | 44309  | 70599  | 28670 | 29884  | 3.32                                            | 5.02                              |
| NM_009040    | Rdh16   | 1412              | 13940  | 1289  | 4862   | 4287   | 6724   | 2208  | 3667   | 3.30                                            | 2.26                              |
| NM_053200    | Ces1d   | 4536              | 41499  | 6764  | 33725  | 41170  | 54071  | 32079 | 42972  | 3.19                                            | 2.37                              |

|              |           |         |        |        |        |        |       |        |        |       |      |
|--------------|-----------|---------|--------|--------|--------|--------|-------|--------|--------|-------|------|
| NM_008604    | Mme       | 114     | 953    | 355    | 1090   | 1226   | 2756  | 594    | 1735   | 3.06  | 3.01 |
| NM_008174    | Grm8      | 274     | 34     | 141    | 108    | 20     | 91    | 60     | 103    | -3.01 | 2.54 |
| NM_133862    | Fgg       | 1103589 | 135522 | 702852 | 166149 | 135084 | 98987 | 567935 | 210398 | -3.03 | 2.13 |
| NM_130890    | Capn8     | 831     | 102    | 924    | 201    | 266    | 238   | 529    | 381    | -3.03 | 2.58 |
| NM_024440    | Derl3     | 571     | 68     | 802    | 99     | 65     | 217   | 121    | 576    | -3.07 | 2.49 |
| NM_008630    | Mt2       | 37813   | 4466   | 10749  | 132    | 1586   | 23    | 21113  | 101    | -3.08 | 4.42 |
| NM_153392    | Ttc39a    | 267     | 31     | 231    | 39     | 80     | 90    | 190    | 60     | -3.11 | 2.22 |
| NM_001130479 | Nucb2     | 1193    | 133    | 1043   | 232    | 169    | 330   | 494    | 526    | -3.17 | 2.99 |
| NM_018731    | Atp4a     | 135     | 15     | 124    | 60     | 33     | 22    | 83     | 79     | -3.17 | 2.69 |
| NM_001036684 | Atp2b2    | 307     | 34     | 311    | 46     | 73     | 212   | 128    | 188    | -3.17 | 2.00 |
| NM_010107    | Efna1     | 7695    | 817    | 3903   | 922    | 1334   | 1071  | 2334   | 3909   | -3.24 | 2.33 |
| NM_001033851 | Cpne8     | 771     | 80     | 513    | 69     | 56     | 80    | 453    | 96     | -3.27 | 2.37 |
| NM_008416    | Junb      | 5250    | 515    | 1986   | 1459   | 698    | 714   | 3111   | 1664   | -3.35 | 2.72 |
| NM_176998    | Sybu      | 228     | 22     | 100    | 21     | 9      | 26    | 85     | 19     | -3.37 | 2.32 |
| NM_053083    | Lox14     | 2160    | 206    | 2003   | 262    | 180    | 220   | 362    | 1332   | -3.39 | 3.20 |
| NM_019807    | Acpp      | 582     | 54     | 293    | 113    | 60     | 77    | 388    | 143    | -3.43 | 2.13 |
| NM_027528    | Nos1ap    | 378     | 35     | 236    | 42     | 74     | 46    | 125    | 33     | -3.43 | 4.85 |
| NM_175138    | Dnaic1    | 184     | 17     | 219    | 30     | 46     | 8     | 138    | 48     | -3.44 | 3.85 |
| NM_144834    | Serpina10 | 103177  | 9449   | 61008  | 13882  | 15746  | 11522 | 54664  | 16706  | -3.45 | 2.45 |
| NM_013602    | Mt1       | 71286   | 6507   | 24455  | 461    | 2665   | 185   | 30528  | 309    | -3.45 | 2.47 |
| NM_134164    | Syt12     | 1633    | 148    | 994    | 109    | 117    | 67    | 796    | 140    | -3.46 | 2.02 |

|              |           |         |        |         |        |        |        |        |        |       |      |
|--------------|-----------|---------|--------|---------|--------|--------|--------|--------|--------|-------|------|
| NM_001111048 | Fga       | 1895992 | 167758 | 1240269 | 288068 | 237358 | 176881 | 991503 | 372547 | -3.50 | 2.61 |
| NM_013650    | S100a8    | 814     | 72     | 336     | 35     | 16     | 10     | 550    | 57     | -3.50 | 4.58 |
| NM_009184    | Ptk6      | 140     | 12     | 146     | 27     | 34     | 72     | 113    | 100    | -3.54 | 5.93 |
| NM_029720    | Crel2     | 17229   | 1452   | 10370   | 1379   | 2246   | 5477   | 4429   | 7634   | -3.57 | 2.77 |
| NM_018746    | Itih4     | 863236  | 72748  | 366005  | 77526  | 103731 | 57841  | 365805 | 91462  | -3.57 | 2.11 |
| NM_001080940 | Angptl8   | 2353    | 191    | 1623    | 4669   | 8929   | 3099   | 5679   | 3611   | -3.62 | 3.00 |
| NM_013888    | Dnajc12   | 7024    | 570    | 5884    | 537    | 507    | 268    | 6426   | 473    | -3.62 | 2.36 |
| NM_009114    | S100a9    | 1458    | 116    | 630     | 95     | 40     | 38     | 995    | 101    | -3.65 | 2.03 |
| NM_008768    | Orm1      | 331138  | 25883  | 190817  | 21629  | 18535  | 16415  | 237132 | 26431  | -3.68 | 3.38 |
| NM_001198955 | Gm7694    | 1758    | 137    | 972     | 132    | 225    | 243    | 786    | 136    | -3.68 | 2.34 |
| NM_001025605 | Gm527     | 154     | 11     | 97      | 33     | 28     | 20     | 104    | 25     | -3.81 | 2.23 |
| NM_001204233 | Spp1      | 20217   | 1437   | 8781    | 3267   | 1658   | 1895   | 9828   | 3161   | -3.81 | 2.00 |
| NM_023556    | Mvk       | 1913    | 133    | 3002    | 1037   | 922    | 588    | 779    | 1577   | -3.85 | 2.88 |
| NM_021509    | Moxd1     | 348     | 22     | 5290    | 240    | 58     | 25     | 7368   | 840    | -3.98 | 2.47 |
| NM_022324    | Sdf2l1    | 14529   | 892    | 8682    | 1715   | 1715   | 2581   | 3445   | 6416   | -4.03 | 3.97 |
| NM_001002897 | Atg9b     | 134     | 8      | 102     | 15     | 24     | 55     | 60     | 30     | -4.07 | 3.84 |
| NM_033269    | Chrm3     | 480     | 26     | 290     | 41     | 14     | 25     | 292    | 59     | -4.21 | 2.86 |
| NM_009252    | Serpina3n | 431060  | 23065  | 186898  | 16017  | 24684  | 12094  | 168396 | 17618  | -4.22 | 2.11 |
| NM_026929    | Chac1     | 681     | 35     | 312     | 254    | 57     | 225    | 251    | 91     | -4.28 | 2.21 |
| NM_018861    | Slc1a4    | 3700    | 190    | 935     | 307    | 192    | 293    | 540    | 615    | -4.28 | 2.30 |
| NM_145360    | Idi1      | 13477   | 686    | 31578   | 8833   | 9255   | 7432   | 7537   | 15098  | -4.30 | 2.58 |



|              |               |         |       |        |      |      |      |        |      |       |      |
|--------------|---------------|---------|-------|--------|------|------|------|--------|------|-------|------|
| NM_001127318 | Gucy2c        | 457     | 23    | 224    | 14   | 38   | 5    | 208    | 2    | -4.31 | 3.41 |
| NM_008141    | Gnat2         | 350     | 17    | 287    | 73   | 63   | 100  | 127    | 151  | -4.36 | 4.86 |
| NM_021400    | Prg4          | 9830    | 472   | 3064   | 496  | 1115 | 737  | 3402   | 589  | -4.38 | 4.92 |
| NM_013623    | Orm3          | 1648    | 77    | 374    | 30   | 30   | 46   | 653    | 19   | -4.42 | 2.51 |
| NM_001242427 | Slc37a1       | 1580    | 73    | 685    | 120  | 50   | 53   | 561    | 106  | -4.44 | 3.25 |
| NM_009205    | Slc3a1        | 26252   | 1190  | 16016  | 2774 | 4331 | 2412 | 15654  | 4333 | -4.46 | 2.62 |
| NM_138656    | Mvd           | 1489    | 65    | 3080   | 766  | 750  | 1358 | 1060   | 2347 | -4.52 | 3.37 |
| NM_007805    | Cyb561        | 4392    | 191   | 2370   | 378  | 626  | 230  | 1858   | 497  | -4.52 | 5.61 |
| NM_015804    | Atp11a        | 7768    | 325   | 6420   | 867  | 827  | 715  | 4516   | 1402 | -4.58 | 6.16 |
| NM_019521    | Gas6          | 15816   | 655   | 5724   | 1300 | 1509 | 1286 | 3852   | 1619 | -4.59 | 2.97 |
| NM_001272098 | Fabp5         | 7467    | 308   | 6239   | 4405 | 2674 | 1459 | 2884   | 2706 | -4.60 | 2.02 |
| NM_007707    | Socs3         | 5751    | 234   | 2847   | 354  | 364  | 709  | 3061   | 226  | -4.62 | 2.23 |
| NM_145133    | Tifa          | 11101   | 449   | 2767   | 828  | 436  | 416  | 2457   | 717  | -4.63 | 2.71 |
| NM_019568    | Cxcl14        | 964     | 38    | 1094   | 71   | 72   | 51   | 704    | 126  | -4.66 | 5.64 |
| NM_027808    | Alpk1         | 3076    | 110   | 1081   | 253  | 180  | 159  | 570    | 225  | -4.81 | 2.61 |
| NM_011318    | Apcs          | 168188  | 5740  | 81733  | 4321 | 5578 | 1643 | 66121  | 3737 | -4.87 | 2.45 |
| NM_001168318 | Scara5        | 1992    | 59    | 1448   | 300  | 389  | 342  | 1426   | 273  | -5.08 | 3.08 |
| NM_008759    | Sebox         | 304     | 9     | 165    | 22   | 27   | 23   | 161    | 32   | -5.08 | 2.51 |
| NM_026739    | 9530077C05Rik | 949     | 27    | 104    | 19   | 26   | 16   | 80     | 33   | -5.14 | 2.22 |
| NM_177388    | Slc41a2       | 18873   | 533   | 11394  | 2469 | 1233 | 1917 | 12861  | 3341 | -5.15 | 3.53 |
| NM_009117    | Saa1          | 1205273 | 33102 | 492205 | 2994 | 6994 | 1186 | 565930 | 3138 | -5.19 | 2.56 |

|              |         |         |       |        |      |      |      |        |      |       |      |
|--------------|---------|---------|-------|--------|------|------|------|--------|------|-------|------|
| NM_023627    | Isyna1  | 9620    | 233   | 3166   | 275  | 607  | 245  | 2672   | 368  | -5.37 | 4.60 |
| NM_213614    | Sept5   | 172     | 4     | 175    | 29   | 35   | 16   | 40     | 42   | -5.43 | 3.45 |
| NM_054098    | Steap4  | 128289  | 2602  | 47040  | 8941 | 7873 | 8508 | 42716  | 9319 | -5.62 | 2.27 |
| NM_153577    | Syne4   | 843     | 16    | 389    | 57   | 74   | 62   | 448    | 67   | -5.72 | 2.19 |
| NM_010108    | Efna3   | 286     | 4     | 212    | 70   | 28   | 25   | 182    | 93   | -6.16 | 5.28 |
| NM_011314    | Saa2    | 1632400 | 20628 | 663227 | 1621 | 4104 | 552  | 833830 | 1756 | -6.31 | 2.15 |
| NM_177820    | Apol10b | 749     | 8     | 293    | 22   | 6    | 13   | 155    | 19   | -6.55 | 3.78 |
| NM_011016    | Orm2    | 123515  | 950   | 51018  | 481  | 458  | 223  | 68211  | 359  | -7.02 | 2.20 |
| NM_001004148 | Slc13a5 | 2900    | 22    | 1314   | 23   | 54   | 16   | 722    | 36   | -7.04 | 3.87 |
| NM_010800    | Bhlha15 | 1061    | 8     | 170    | 33   | 62   | 78   | 113    | 145  | -7.05 | 5.66 |
| NM_011315    | Saa3    | 22611   | 150   | 33197  | 345  | 131  | 127  | 53817  | 298  | -7.24 | 2.81 |
| NM_008491    | Lcn2    | 89738   | 513   | 60150  | 144  | 415  | 100  | 60879  | 142  | -7.45 | 3.10 |
| NM_011178    | Prtn3   | 2459    | 12    | 2005   | 54   | 282  | 16   | 1573   | 27   | -7.68 | 2.49 |
| NM_021352    | Crybb3  | 1942    | 6     | 1241   | 30   | 77   | 13   | 329    | 22   | -8.34 | 2.03 |
| NM_008176    | Cxcl1   | 11902   | 35    | 2982   | 105  | 334  | 108  | 3850   | 196  | -8.41 | 2.35 |
| NM_175628    | A2m     | 14459   | 19    | 817    | 30   | 13   | 16   | 522    | 34   | -9.57 | 2.14 |

**Supplementary Table 3. List of mRNAs clustered from Supplementary Data 2 and 3.**

| Tracking_ID  | Gene     | FPKM value        |       |       |       |      |       |       |       | Log2 (Refed vs. <i>Ad libitum</i> )   $\leq 0.5$ | Log2 (CT Peak vs. Nadir) $\geq 2$ |
|--------------|----------|-------------------|-------|-------|-------|------|-------|-------|-------|--------------------------------------------------|-----------------------------------|
|              |          | <i>Ad libitum</i> | Refed | CT1   | CT5   | CT9  | CT13  | CT17  | CT21  |                                                  |                                   |
| NM_175692    | Snhg11   | 179               | 252   | 158   | 287   | 350  | 405   | 62    | 284   | 0.49                                             | 2.71                              |
| NM_029662    | Mfsd2a   | 275               | 387   | 114   | 97    | 822  | 399   | 282   | 27    | 0.49                                             | 4.93                              |
| NM_007703    | Elov13   | 3486              | 4811  | 11364 | 12688 | 1761 | 6855  | 13472 | 47617 | 0.46                                             | 4.76                              |
| NM_027881    | Osbp13   | 90                | 124   | 61    | 165   | 143  | 245   | 154   | 116   | 0.46                                             | 2.01                              |
| NM_011498    | Bhlhe40  | 2935              | 3832  | 1419  | 7122  | 6031 | 4338  | 3808  | 1596  | 0.38                                             | 2.33                              |
| NM_001166177 | Arsg     | 740               | 965   | 1292  | 847   | 352  | 431   | 919   | 1423  | 0.38                                             | 2.02                              |
| NM_027816    | Cyp2u1   | 1447              | 1872  | 2550  | 4424  | 2721 | 3192  | 1330  | 7345  | 0.37                                             | 2.47                              |
| NM_016710    | Hmgn5    | 363               | 461   | 388   | 302   | 710  | 1577  | 348   | 373   | 0.34                                             | 2.38                              |
| NM_146118    | Slc25a25 | 9282              | 11604 | 2114  | 1825  | 5134 | 15158 | 12262 | 8729  | 0.32                                             | 3.05                              |
| NM_012055    | Asns     | 372               | 461   | 386   | 127   | 86   | 84    | 389   | 135   | 0.31                                             | 2.21                              |
| NM_001035228 | St3gal5  | 2616              | 3048  | 2491  | 2961  | 9000 | 5830  | 2826  | 1848  | 0.22                                             | 2.28                              |
| NM_009767    | Chic1    | 450               | 521   | 903   | 495   | 266  | 479   | 479   | 1592  | 0.21                                             | 2.58                              |
| NM_013692    | Klf10    | 846               | 969   | 505   | 2054  | 1272 | 1053  | 836   | 947   | 0.20                                             | 2.02                              |
| NM_013559    | Hsph1    | 3288              | 3735  | 1535  | 739   | 2382 | 6152  | 1075  | 3585  | 0.18                                             | 3.06                              |
| NM_009344    | Phlda1   | 704               | 789   | 1156  | 957   | 945  | 3924  | 1916  | 623   | 0.16                                             | 2.66                              |
| NM_001080940 | Angptl8  | 2353              | 2604  | 1623  | 4669  | 8929 | 3099  | 5679  | 3611  | 0.15                                             | 2.46                              |
| NM_008245    | Hhex     | 862               | 941   | 1432  | 1945  | 1380 | 3388  | 1351  | 796   | 0.13                                             | 2.09                              |
| NM_011825    | Grem2    | 407               | 444   | 539   | 2575  | 669  | 1506  | 713   | 343   | 0.13                                             | 2.91                              |

|              |                   |       |       |       |       |       |       |       |       |       |      |
|--------------|-------------------|-------|-------|-------|-------|-------|-------|-------|-------|-------|------|
| NM_010755    | Maff              | 149   | 162   | 58    | 277   | 107   | 114   | 98    | 123   | 0.12  | 2.26 |
| NM_145449    | Ifi2712b          | 673   | 715   | 517   | 208   | 133   | 110   | 893   | 189   | 0.09  | 3.02 |
| NM_025685    | Col27a1           | 662   | 697   | 501   | 780   | 1952  | 2733  | 593   | 1371  | 0.07  | 2.45 |
| NM_178216    | Hist2h3c1         | 142   | 148   | 90    | 22    | 73    | 192   | 128   | 93    | 0.06  | 3.13 |
| NM_028203    | Wdr89             | 160   | 164   | 187   | 76    | 113   | 198   | 159   | 428   | 0.04  | 2.49 |
| NM_029809    | 2310014L17R<br>ik | 1418  | 1450  | 1805  | 1225  | 765   | 778   | 1827  | 3553  | 0.03  | 2.22 |
| NM_023733    | Crot              | 23187 | 23570 | 33504 | 36786 | 11042 | 13727 | 24999 | 45891 | 0.02  | 2.06 |
| NM_011105    | Pkdrej            | 125   | 126   | 321   | 384   | 515   | 84    | 180   | 653   | 0.01  | 2.96 |
| NM_011580    | Thbs1             | 318   | 314   | 379   | 180   | 89    | 91    | 139   | 381   | -0.02 | 2.10 |
| NM_009744    | Bcl6              | 1253  | 1214  | 400   | 518   | 2297  | 998   | 249   | 3599  | -0.05 | 3.85 |
| NM_008361    | Il1b              | 286   | 277   | 143   | 61    | 46    | 80    | 239   | 137   | -0.05 | 2.38 |
| NM_178082    | Insig2            | 13830 | 13269 | 8839  | 7425  | 2772  | 6741  | 7410  | 17950 | -0.06 | 2.69 |
| NM_172612    | Rnd1              | 638   | 599   | 526   | 240   | 385   | 600   | 738   | 1040  | -0.09 | 2.12 |
| NM_175512    | Dhrs9             | 232   | 216   | 347   | 148   | 35    | 122   | 165   | 541   | -0.10 | 3.95 |
| NM_009915    | Ccr2              | 208   | 192   | 315   | 265   | 114   | 95    | 417   | 249   | -0.12 | 2.13 |
| NM_007742    | Col1a1            | 457   | 420   | 1419  | 849   | 328   | 165   | 790   | 701   | -0.12 | 3.10 |
| NM_138302    | Tymp              | 2472  | 2235  | 2650  | 3172  | 1046  | 1704  | 2015  | 5712  | -0.15 | 2.45 |
| NM_178206    | Hist1h3h          | 225   | 203   | 144   | 137   | 75    | 103   | 372   | 135   | -0.15 | 2.31 |
| NM_028894    | Lonrf3            | 713   | 642   | 401   | 275   | 1040  | 1506  | 1260  | 1427  | -0.15 | 2.45 |
| NM_001166580 | 8430408G22<br>Rik | 2261  | 2028  | 3711  | 2152  | 1024  | 350   | 525   | 4535  | -0.16 | 3.70 |

|              |                   |       |       |       |      |      |      |      |       |       |      |
|--------------|-------------------|-------|-------|-------|------|------|------|------|-------|-------|------|
| NM_009450    | Tubb2a            | 10069 | 8809  | 9265  | 2331 | 1293 | 4037 | 6867 | 14134 | -0.19 | 3.45 |
| NM_010128    | Emp1              | 189   | 165   | 266   | 130  | 65   | 81   | 255  | 210   | -0.20 | 2.03 |
| NM_133974    | Cdcp1             | 568   | 494   | 531   | 150  | 237  | 451  | 294  | 646   | -0.20 | 2.11 |
| NM_001111288 | Sco2              | 2199  | 1906  | 2241  | 2491 | 997  | 1603 | 1868 | 4586  | -0.21 | 2.20 |
| NM_013743    | Pdk4              | 310   | 265   | 338   | 103  | 207  | 449  | 303  | 1288  | -0.23 | 3.64 |
| NM_016674    | Cldn1             | 5851  | 4979  | 6430  | 3700 | 2197 | 5127 | 6669 | 9523  | -0.23 | 2.12 |
| NM_008141    | Gnat2             | 350   | 293   | 287   | 73   | 63   | 100  | 127  | 151   | -0.26 | 2.19 |
| NM_172514    | Tmem71            | 108   | 90    | 135   | 96   | 34   | 58   | 157  | 75    | -0.26 | 2.21 |
| NM_001104529 | Gpr35             | 102   | 84    | 87    | 52   | 36   | 27   | 112  | 63    | -0.28 | 2.05 |
| NM_145360    | Idi1              | 13477 | 11016 | 31578 | 8833 | 9255 | 7432 | 7537 | 15098 | -0.29 | 2.09 |
| NM_011281    | Rorc              | 3127  | 2458  | 1689  | 2260 | 5066 | 7440 | 7952 | 3101  | -0.35 | 2.24 |
| NM_145143    | Mpp4              | 31    | 24    | 28    | 82   | 59   | 227  | 30   | 63    | -0.37 | 3.02 |
| NM_008638    | Mthfd2            | 153   | 117   | 206   | 94   | 30   | 49   | 152  | 169   | -0.39 | 2.78 |
| NM_016854    | Ppp1r3c           | 5623  | 4232  | 3254  | 3307 | 2217 | 2108 | 3955 | 11981 | -0.41 | 2.51 |
| NM_010999    | Olf56             | 161   | 119   | 231   | 122  | 43   | 61   | 241  | 167   | -0.44 | 2.49 |
| NM_021491    | Smpd3             | 739   | 544   | 695   | 233  | 230  | 232  | 670  | 136   | -0.44 | 2.35 |
| NM_175093    | Trib3             | 117   | 86    | 174   | 347  | 128  | 59   | 50   | 199   | -0.44 | 2.79 |
| NM_138656    | Mvd               | 1489  | 1093  | 3080  | 766  | 750  | 1358 | 1060 | 2347  | -0.45 | 2.04 |
| NM_018869    | Grk5              | 311   | 227   | 505   | 201  | 203  | 242  | 290  | 971   | -0.45 | 2.27 |
| NM_027237    | 2010003K11<br>Rik | 1087  | 793   | 909   | 448  | 196  | 137  | 860  | 313   | -0.45 | 2.73 |

**Supplementary Table 4. List of mRNAs clustered from Supplementary Data 1, Supplementary Data 2 and 3.**

| Tracking_ID  | Gene    | FPKM value        |        |       |       |      |      |      |      |       | Log2 (Fasted vs. <i>Ad libitum</i> )   $\geq 3$ | Log2 (Refed vs. <i>Ad libitum</i> )   $\leq 0.5$ | Log2 (CT Peak vs. Nadir) $\geq 2$ |
|--------------|---------|-------------------|--------|-------|-------|------|------|------|------|-------|-------------------------------------------------|--------------------------------------------------|-----------------------------------|
|              |         | <i>Ad libitum</i> | Fasted | Refed | CT1   | CT5  | CT9  | CT13 | CT17 | CT21  |                                                 |                                                  |                                   |
| NM_029662    | Mfsd2a  | 275               | 5237   | 387   | 114   | 97   | 822  | 399  | 282  | 27    | 4.25                                            | 0.49                                             | 4.93                              |
| NM_013743    | Pdk4    | 310               | 3111   | 265   | 338   | 103  | 207  | 449  | 303  | 1288  | 3.33                                            | -0.23                                            | 3.64                              |
| NM_001080940 | Angptl8 | 2353              | 191    | 2604  | 1623  | 4669 | 8929 | 3099 | 5679 | 3611  | -3.62                                           | 0.15                                             | 2.46                              |
| NM_145360    | Idi1    | 13477             | 686    | 11016 | 31578 | 8833 | 9255 | 7432 | 7537 | 15098 | -4.30                                           | -0.29                                            | 2.09                              |
| NM_008141    | Gnat2   | 350               | 17     | 293   | 287   | 73   | 63   | 100  | 127  | 151   | -4.36                                           | -0.26                                            | 2.19                              |
| NM_138656    | Mvd     | 1489              | 65     | 1093  | 3080  | 766  | 750  | 1358 | 1060 | 2347  | -4.52                                           | -0.45                                            | 2.04                              |

**Supplementary Table 5. Calculations of Amplitude and Phase shift in Fig. 2d.**

| Gene name | Amplitude |         | <i>P</i> Value for Amplitude | Phaseshift |         | $\Delta$ Phase (Angptl8 vs.PBS) | <i>P</i> Value for Phaseshift | $\Delta$ Phase Average |
|-----------|-----------|---------|------------------------------|------------|---------|---------------------------------|-------------------------------|------------------------|
|           | PBS       | Angptl8 |                              | PBS        | Angptl8 |                                 |                               |                        |
| Per1      | 6.33      | 4.94    | 0.08                         | -11.34     | -12.96  | -1.62                           | 0.0006                        | -1.30                  |
|           | 8.16      | 6.69    |                              | -11.26     | -12.75  | -1.49                           |                               |                        |
|           | 11.32     | 5.84    |                              | -11.21     | -12.53  | -1.32                           |                               |                        |
|           | 7.96      | 6.80    |                              | -11.02     | -12.37  | -1.35                           |                               |                        |
|           | 6.90      | 6.87    |                              | -10.93     | -11.65  | -0.72                           |                               |                        |
| Per2      | 2.14      | 2.49    | 0.08                         | -9.70      | -11.08  | -1.38                           | 0.03                          | -0.98                  |
|           | 2.38      | 2.65    |                              | -9.36      | -10.12  | -0.76                           |                               |                        |
|           | 2.35      | 2.99    |                              | -8.94      | -9.79   | -0.85                           |                               |                        |
|           | 2.06      | 2.42    |                              | -8.88      | -9.63   | -0.75                           |                               |                        |
|           | 2.75      | 2.73    |                              | -8.31      | -9.49   | -1.18                           |                               |                        |
| Bmal1     | 0.42      | 0.44    | 0.66                         | -0.38      | -1.28   | -0.90                           | 0.005                         | -0.73                  |
|           | 0.46      | 0.45    |                              | -0.15      | -1.18   | -1.03                           |                               |                        |
|           | 0.46      | 0.47    |                              | -0.10      | -0.72   | -0.62                           |                               |                        |
|           | 0.50      | 0.53    |                              | -0.05      | -0.63   | -0.57                           |                               |                        |
|           | 0.47      | 0.46    |                              | 0.16       | -0.38   | -0.54                           |                               |                        |
| Dbp       | 0.42      | 0.44    | 0.66                         | -0.38      | -1.28   | -0.90                           | 0.005                         | -0.73                  |
|           | 0.46      | 0.45    |                              | -0.15      | -1.18   | -1.03                           |                               |                        |
|           | 0.46      | 0.47    |                              | -0.10      | -0.72   | -0.62                           |                               |                        |
|           | 0.50      | 0.53    |                              | -0.05      | -0.63   | -0.57                           |                               |                        |
|           | 0.47      | 0.46    |                              | 0.16       | -0.38   | -0.54                           |                               |                        |

**Supplementary Table 6. Calculations of Amplitude in Fig. 3d.**

| Gene name | Amplitude       |         |
|-----------|-----------------|---------|
|           | 50% Horse serum | Angptl8 |
| Per1      | 0.29            | 0.18    |
|           | 0.33            | 0.18    |
|           | 0.39            | 0.18    |
| Per2      | 0.57            | 0.12    |
|           | 0.61            | 0.29    |
|           | 0.71            | 0.31    |
| Bmal1     | 0.34            | 0.86    |
|           | 0.47            | 1.02    |
|           | 0.52            | 1.14    |
| Dbp       | 0.39            | 0.33    |
|           | 0.43            | 0.37    |
|           | 0.46            | 0.38    |



**Supplementary Table 7. Calculations of Amplitude and Phase shift in Fig. 6a.**

| Gene name | Amplitude |         | <i>P</i> Value<br>for Amplitude | Phaseshift |         | <i>P</i> Value<br>for Phaseshift | $\Delta$ Phase | $\Delta$ Phase<br>Average |
|-----------|-----------|---------|---------------------------------|------------|---------|----------------------------------|----------------|---------------------------|
|           | WT        | Per1 KO |                                 | WT         | Per1 KO |                                  |                |                           |
| Per2      | 0.25      | 0.13    | 0.000505886                     | -0.51      | 1.10    | 3.38941E-05                      | 1.61           | 1.77                      |
|           | 0.25      | 0.14    |                                 | -0.50      | 1.33    |                                  | 1.84           |                           |
|           | 0.26      | 0.16    |                                 | -0.49      | 1.37    |                                  | 1.86           |                           |
| Bmal1     | 0.48      | 1.02    | 1.82337E-05                     | -11.06     | -4.10   | 1.3496E-06                       | 6.96           | 6.94                      |
|           | 0.48      | 1.06    |                                 | -11.01     | -3.95   |                                  | 7.06           |                           |
|           | 0.51      | 1.09    |                                 | -10.64     | -3.84   |                                  | 6.80           |                           |
| Dbp       | 0.30      | 0.49    | 0.003603027                     | -2.71      | -2.21   | 0.00018412                       | 0.51           | 0.51                      |
|           | 0.31      | 0.50    |                                 | -2.64      | -2.14   |                                  | 0.50           |                           |
|           | 0.37      | 0.56    |                                 | -2.63      | -2.12   |                                  | 0.51           |                           |

**Supplementary Table 8. Calculations of Amplitude and Phase shift in Fig. 6c.**

| Gene name | Amplitude            |                  | <i>P</i> Value<br>for<br>Amplitude | Phaseshift           |                  | <i>P</i> Value<br>for Phaseshift |
|-----------|----------------------|------------------|------------------------------------|----------------------|------------------|----------------------------------|
|           | Ad-scramble<br>shRNA | Ad-per1<br>shRNA |                                    | Ad-scramble<br>shRNA | Ad-per1<br>shRNA |                                  |
| Per2      | 2.16                 | 1.90             | 0.05                               | -11.70               | -12.07           | 0.18                             |
|           | 2.30                 | 1.52             |                                    | -11.29               | -11.95           |                                  |
|           | 2.92                 | 1.78             |                                    | -11.01               | -11.39           |                                  |
| Bmal1     | 0.55                 | 0.58             | 0.27                               | -2.36                | -2.61            | 0.39                             |
|           | 0.47                 | 0.53             |                                    | -1.89                | -2.35            |                                  |
|           | 0.44                 | 0.50             |                                    | -1.68                | -1.84            |                                  |
| Dbp       | 26.66                | 17.27            | 0.0004                             | 8.20                 | 7.88             | 0.10                             |
|           | 28.14                | 16.22            |                                    | 8.47                 | 8.10             |                                  |
|           | 30.01                | 17.20            |                                    | 8.66                 | 8.25             |                                  |

**Supplementary Table 9. Calculations of Amplitude and Phase shift in Fig. 8d.**

| Gene name | Amplitude            |                  | <i>P</i> Value<br>for<br>Amplitude | Phaseshift               |                  | <i>P</i> Value<br>for Phaseshift |
|-----------|----------------------|------------------|------------------------------------|--------------------------|------------------|----------------------------------|
|           | Ad-scramble<br>shRNA | Ad-PirB<br>shRNA |                                    | Ad-<br>scramble<br>shRNA | Ad-PirB<br>shRNA |                                  |
| Per2      | 0.37                 | 0.48             | 0.11                               | -3.94                    | -4.11            | 0.46                             |
|           | 0.44                 | 0.49             |                                    | -3.91                    | -3.88            |                                  |
|           | 0.45                 | 0.61             |                                    | -3.46                    | -3.77            |                                  |
| Bmal1     | 0.78                 | 0.90             | 0.16                               | -6.86                    | -6.99            | 0.10                             |
|           | 0.80                 | 0.93             |                                    | -6.84                    | -6.94            |                                  |
|           | 0.93                 | 1.10             |                                    | -6.58                    | -6.94            |                                  |
| Dbp       | 0.18                 | 0.24             | 0.002                              | -2.60                    | -2.78            | 0.07                             |
|           | 0.19                 | 0.25             |                                    | -2.00                    | -2.76            |                                  |
|           | 0.20                 | 0.27             |                                    | -1.73                    | -2.69            |                                  |

**Supplementary Table 10. Calculations of Amplitude and Phase shift in Fig. 9g.**

| Gene name | Amplitude    |                    |                   | <i>P</i> Value for Amplitude Refed vs. Fasted | <i>P</i> Value for Amplitude Angptl8 shRNA vs. scramble shRNA | Phaseshift   |              |             | <i>P</i> Value for Phaseshift Refed vs. Fasted | <i>P</i> Value for Phaseshift Angptl8 shRNA vs. scramble shRNA | $\Delta$ Phase Refed scramble shRNA vs. Fasted scramble shRNA | $\Delta$ Phase Average | $\Delta$ Phase Refed Angptl8 shRNA vs. Refed scramble shRNA | $\Delta$ Phase Average |
|-----------|--------------|--------------------|-------------------|-----------------------------------------------|---------------------------------------------------------------|--------------|--------------|-------------|------------------------------------------------|----------------------------------------------------------------|---------------------------------------------------------------|------------------------|-------------------------------------------------------------|------------------------|
|           | Fasted       | Refed              |                   |                                               |                                                               | Fasted       | Refed        |             |                                                |                                                                |                                                               |                        |                                                             |                        |
|           | AAV-scramble | AAV-scramble shRNA | AAV-Angptl8 shRNA |                                               |                                                               | AAV-scramble | AAV-scramble | AAV-Angptl8 |                                                |                                                                |                                                               |                        |                                                             |                        |
| Per2      | 4.35         | 7.77               | 6.27              | 0.01                                          | 0.08                                                          | 10.72        | 9.39         | 9.88        | 0.09                                           | 0.87                                                           | -1.33                                                         | -0.96                  | 0.48                                                        | 0.07                   |
|           | 4.08         | 6.60               | 6.04              |                                               |                                                               | 11.18        | 10.07        | 10.13       |                                                |                                                                | -1.11                                                         |                        | 0.06                                                        |                        |
|           | 4.37         | 9.49               | 4.87              |                                               |                                                               | 11.21        | 10.76        | 10.43       |                                                |                                                                | -0.45                                                         |                        | -0.33                                                       |                        |
| Bmal1     | 0.57         | 0.32               | 0.41              | 0.003                                         | 0.06                                                          | -3.59        | -7.04        | -4.06       | 0.02                                           | 0.03                                                           | -3.46                                                         | -2.42                  | 2.98                                                        | 2.15                   |
|           | 0.77         | 0.26               | 0.60              |                                               |                                                               | -3.52        | -5.52        | -3.57       |                                                |                                                                | -2.00                                                         |                        | 1.94                                                        |                        |
|           | 0.65         | 0.27               | 0.39              |                                               |                                                               | -3.24        | -5.05        | -3.53       |                                                |                                                                | -1.81                                                         |                        | 1.52                                                        |                        |
| Dbp       | 10.44        | 3.95               | 6.06              | 0.0003                                        | 0.01                                                          | 7.75         | 6.68         | 6.69        | 0.00                                           | 0.49                                                           | -1.07                                                         | -1.01                  | 0.01                                                        | 0.12                   |
|           | 11.39        | 2.69               | 6.67              |                                               |                                                               | 7.76         | 6.76         | 7.06        |                                                |                                                                | -1.00                                                         |                        | 0.30                                                        |                        |
|           | 12.24        | 3.70               | 8.68              |                                               |                                                               | 7.96         | 7.01         | 7.08        |                                                |                                                                | -0.95                                                         |                        | 0.07                                                        |                        |

**Supplementary Table 11. Calculations of Amplitude and Phase shift in Fig. 10d.**

| Gene name | Amplitude |             |              | P Value for Amplitude (Refed vs. Fasted) | P Value for Amplitude (Anti-Angptl8 vs. Control IgG) | Phaseshift |             |              | P Value for Phaseshift Refed vs. Fasted | P Value for Phaseshift Anti-Angptl8 vs. Control IgG | $\Delta$ Phase Refed vs. Fasted | $\Delta$ Phase Average | $\Delta$ Phase Anti-Angptl8 vs. Control IgG | $\Delta$ Phase Average |
|-----------|-----------|-------------|--------------|------------------------------------------|------------------------------------------------------|------------|-------------|--------------|-----------------------------------------|-----------------------------------------------------|---------------------------------|------------------------|---------------------------------------------|------------------------|
|           | Fasted    | Refed       |              |                                          |                                                      | Fasted     | Refed       |              |                                         |                                                     |                                 |                        |                                             |                        |
|           |           | Control IgG | Anti-Angptl8 |                                          |                                                      |            | Control IgG | Anti-Angptl8 |                                         |                                                     |                                 |                        |                                             |                        |
| Per2      | 1.22      | 2.62        | 1.76         | 2.53E-05                                 | 0.003                                                | 11.41      | 10.29       | 10.54        | 0.22                                    | 0.78                                                | -1.12                           | -0.70                  | 0.25                                        | -0.15                  |
|           | 1.33      | 2.72        | 1.86         |                                          |                                                      | 11.90      | 11.40       | 11.08        |                                         |                                                     | -0.50                           |                        | -0.32                                       |                        |
|           | 1.21      | 2.55        | 1.38         |                                          |                                                      | 12.18      | 11.69       | 11.32        |                                         |                                                     | -0.49                           |                        | -0.37                                       |                        |
| Bmal1     | 0.43      | 0.21        | 0.21         | 0.002                                    | 0.15                                                 | -3.15      | -7.53       | -5.08        | 0.0005                                  | 4.2E-05                                             | -4.38                           | -4.85                  | 2.45                                        | 2.48                   |
|           | 0.54      | 0.16        | 0.30         |                                          |                                                      | -2.89      | -7.48       | -4.96        |                                         |                                                     | -4.59                           |                        | 2.52                                        |                        |
|           | 0.49      | 0.24        | 0.30         |                                          |                                                      | -1.68      | -7.24       | -4.77        |                                         |                                                     | -5.56                           |                        | 2.47                                        |                        |
| Dbp       | 8.35      | 1.60        | 2.74         | 0.0008                                   | 0.01                                                 | 7.19       | 6.65        | 5.81         | 0.41                                    | 0.008                                               | -0.54                           | -0.26                  | -0.84                                       | -1.21                  |
|           | 7.47      | 1.05        | 2.52         |                                          |                                                      | 7.27       | 7.34        | 5.91         |                                         |                                                     | 0.07                            |                        | -1.43                                       |                        |
|           | 6.14      | 0.91        | 2.05         |                                          |                                                      | 7.68       | 7.38        | 6.01         |                                         |                                                     | -0.30                           |                        | -1.37                                       |                        |

**Supplementary Table 12. List of primers used for qPCR analysis, promoter construction and shRNA oligonucleotides for gene knockdown.**

| <b>List of Primers used for qPCR analysis.</b> |                                         |                                         |
|------------------------------------------------|-----------------------------------------|-----------------------------------------|
| <b>Mouse Genes</b>                             | <b>Forward Primer Sequences (5'-3')</b> | <b>Reverse Primer Sequences (5'-3')</b> |
| <i>36B4</i>                                    | GAAACTGCTGCCTCACATCCG                   | GCTGGCACAGTGACCTCACACG                  |
| <i>Bmal1</i>                                   | TGGAGGGACTCCAGACATTC                    | TGGGACTACTTGATCCTTGG                    |
| <i>Per1</i>                                    | AACGGGATGTGTTTCGGGGTGC                  | AGGACCTCCTCTGATTCCGGCAG                 |
| <i>Per2</i>                                    | TGATCGAGACGCCTGTGCTCGT                  | CTCCACGGGTTGATGAAGCTGG                  |
| <i>Dbp</i>                                     | CTTTGAACCTGATCCCGCTG                    | TTGTTCTTGTACCTCCGGCT                    |
| <i>Angptl8</i>                                 | CTCAATGGCGTGTACAGAGC                    | TCGAAGGTGTAAAGCGTCCT                    |
| <i>Pdk4</i>                                    | TGGCTGGTTTTGGTTATGGC                    | GTTCTTCGGTTCCTGCTTG                     |
| <i>Cpt1a</i>                                   | CTCAGTGGGAGCGACTCTTCA                   | GGCCTCTGTGGTACACGACAA                   |
| <i>Hmgcr</i>                                   | GGTGTTC AAGGAGCATGCAA                   | TTGGTGCACGTTCCCTTGAAG                   |
| <i>Pck1</i>                                    | AGCCTTTGGTCAACA ACTGG                   | TGCCTTCGGGGTTAGTTATG                    |
| <i>Pirb</i>                                    | AGGATGGAGTGGAGCTGAAC                    | TGATTGTTTGCTCCTTGGCC                    |
| <i>Mfsd2a</i>                                  | TTGCCTCTGGAGTCTCACTG                    | GCCGCTTCTCCTCATCAATG                    |
| <i>Atp4a</i>                                   | TTGCGAGATCCCCTTCAACT                    | GGCAGAAACCAAGAACACGT                    |
| <i>Idi1</i>                                    | AGCCGGAATCTCTGTGTTCT                    | TTTTCTTGGTGT CAGCCCCA                   |
| <i>Gnat2</i>                                   | CATCTATGGGAACGTGCTGC                    | TGATGACGTCCACCAACTCA                    |
| <i>Mvd</i>                                     | AAGGACTTCACAGAGGACCG                    | CAGCAGTGGGGAAGTTGTTC                    |

| <b>Primers for <i>Per1</i> promoter.</b>          |                                                                    |                                         |
|---------------------------------------------------|--------------------------------------------------------------------|-----------------------------------------|
| <b>Mouse Gene</b>                                 | <b>Forward Primer Sequences (5'-3')</b>                            | <b>Reverse Primer Sequences (5'-3')</b> |
| <i>Per1</i>                                       | CGG GGTACC GGCAGTTGAATAGAGATCGG                                    | CG ACGCGT GGCAAGCCCTTGTAAGC             |
| <b>shRNA oligonucleotides for gene knockdown.</b> |                                                                    |                                         |
| <b>shRNA oligonucleotides</b>                     | <b>Sequences (5'-3')</b>                                           |                                         |
| Scramble shRNA                                    | GTTCTCCGAACGTGTCACGTTTCAAGAGAACGTGACACGTTCCGAGAACTTTTTT            |                                         |
| <i>Per1</i> shRNA                                 | GGAGCATATCACATCCGAATATTCAAGAGATATTCGGATGTGATATGCTCCTTTTTT          |                                         |
| Scramble shRNA                                    | GTTCTCCGAACGTGTCACGTAATTCAAGAGATTACGTGACACGTTCCGAGAACTTTTTT        |                                         |
| <i>Angptl8</i> shRNA                              | GTATGAAGAGCTGACCCTGCTCTTTCTTCAAGAGAGAAAGAGCAGGGTCAGCTCTTCATATTTTTT |                                         |
