# Supplementary material for: Angptl8 mediates food-driven resetting of hepatic circadian clock in mice
Source: PubMed Central journal article supplement (PMC6684615; doi:10.1038/s41467-019-11513-1), 2019-08-06
Supplement: 41467_2019_11513_MOESM3_ESM.pdf [file 41467_2019_11513_MOESM3_ESM.pdf]

## Description of Additional Supplementary Files

**File name:** Supplementary Data 1

**Description:** List of mRNAs that are highly regulated in the liver of 16-h fasted mice ( |  $\text{Log}_2$  (Fasted vs. *Ad libitum*) |  $\cong$  3).

**File name:** Supplementary Data 2

**Description:** List of mRNAs that are conserved in the liver of mice subjected to refed ( |  $\text{Log}_2$  (Refed vs. *Ad libitum*) |  $\cong$  0.5).

**File name:** Supplementary Data 3

**Description:** List of mRNAs that are highly regulated in the liver of mice subjected to DD ( $\text{Log}_2$  (CT Peak vs. Nadir)  $\cong$  2).
